# Supplementary material for: Grk1b and Grk7a Both Contribute to the Recovery of the Isolated Cone Photoresponse in Larval Zebrafish
Source: PubMed Central journal article supplement — Invest Ophthalmol Vis Sci. 2018 Oct;59(12):5116–24. doi: 10.1167/iovs.18-24455 (PMC6203174; doi:10.1167/iovs.18-24455), 2018-10
Supplement: iovs-59-11-49_s01.pdf [file iovs-59-11-49_s01.pdf]

A

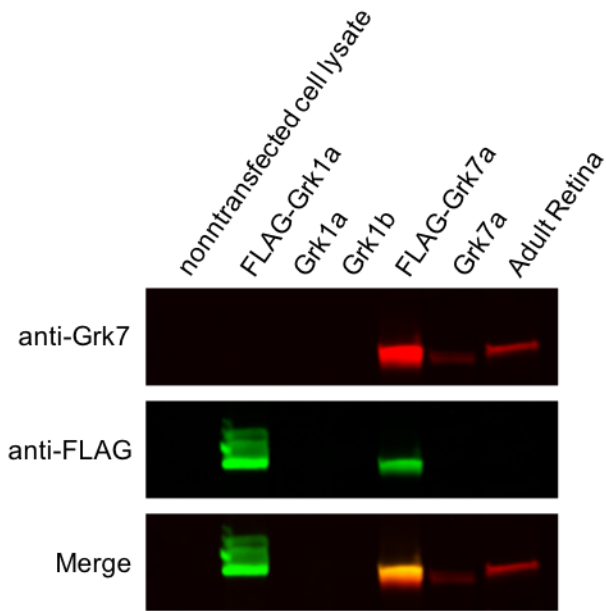

B

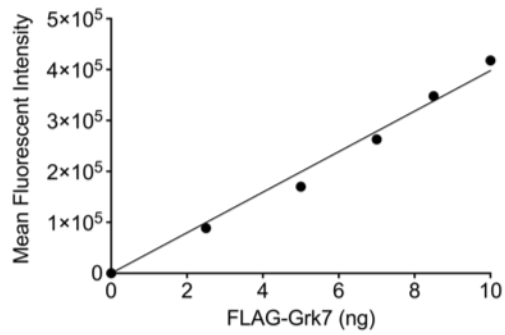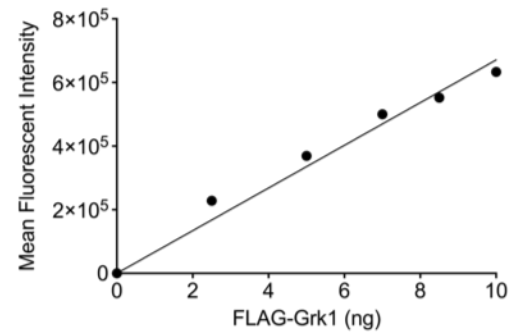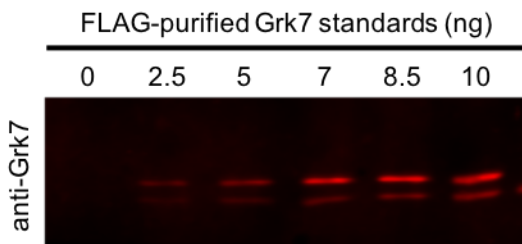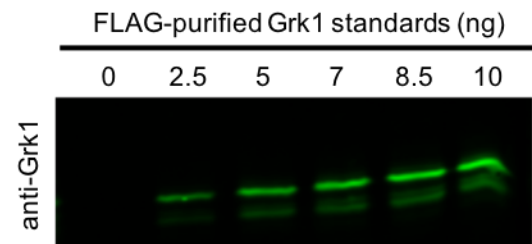

**Figure S1. Specificity of a novel anti-Grk7 antibody and standard curves for quantifying Grk7/Grk1 ratios.** A, Immunodetection of 25  $\mu$ g each of recombinant cell lysates prepared from HEK293 cells as described in the Methods. For immunodetection, the immunoblot was incubated with anti-Grk7 (red) and anti-FLAG (green) antibodies at dilutions of 1:10,000 followed by incubation with secondary antibodies at a dilution of 1:15,000. B, Representative standard curves and accompanying immunoblots of FLAG-purified recombinant zebrafish Grk1b and Grk7a used for quantifying ratios of endogenous Grk7/Grk1. Standards were run on the same blots as samples each time to account for variabilities in immunoblotting and visualization.

wildtype

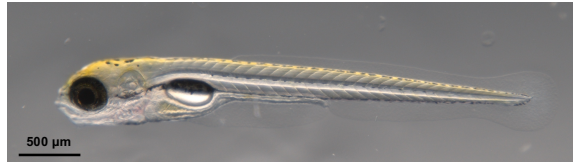

*grk7a*<sup>-/-</sup>

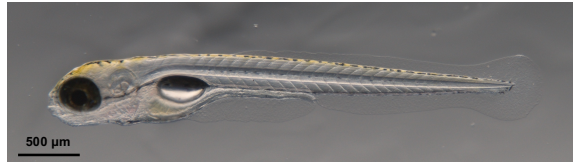

*grk1b*<sup>-/-</sup>

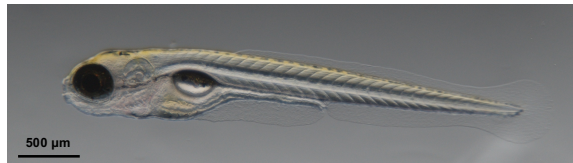

**Figure S2. Morphology of whole zebrafish larvae at 5 dpf is qualitatively unchanged in both *grk1b*<sup>-/-</sup> and *grk7a*<sup>-/-</sup> larvae compared to wildtype.** Larvae were anesthetized with 0.02% Tricaine and immobilized in 3% methylcellulose. Brightfield images of larvae were captured with a Zeiss Axio Zoom.V16 stereo zoom microscope with accompanying camera and software (Zeiss, Oberkochen, Germany).
